# Supplementary material for: Associations between health-related quality of life and demographics and health risks. Results from Rhode Island's 2002 behavioral risk factor survey
Source: Springer Nature journal article supplement (doi:10.1186/1477-7525-4-14), 2006-03-03
Supplement: Additional file 2 [file 1477-7525-4-14-s2.pdf]

## **Appendix B.**

Items from the 2002 Rhode Island BRFSS used as independent variables:

1. Age – Three categories
  - 1) 18 – 44
  - 2) 45-64
  - 3) 65+
  
2. Sex
  - 1) Male
  - 2) Female
  
3. Race/Ethnicity
  - 1) White non-Hispanic
  - 2) Hispanic
  - 3) Other non-Hispanic
  
4. Household Income
  - 1) <\$25,000
  - 2) \$25,000 – \$49,999
  - 3) \$50,000 or more
  
5. Employment
  - 1) Unable to work
  - 2) Unemployed
  - 3) Retired
  - 4) Homemaker/Student
  - 5) Employed
  
6. Currently has asthma
  - 1) Asthma
  - 2) No Asthma
  
7. Respondent was told by a doctor that he/she has diabetes.
  - 1) Diabetes
  - 2) No Diabetes
  
8. Two Level Body Mass Index (BMI) categories. BMI = weight in kilograms divided by the square of height in meters ( $\text{kg}/\text{m}^2$ ), and is based on self-reported height and weight.
  - 1) Obese ( $\text{BMI} > 30$ )
  - 2) Not Obese ( $\text{BMI} \leq 30$ )

9. Physical disability: Respondents limited in any way in any activity because of any physical problem, or using special equipment such as a cane, a wheelchair, a special bed, or a special telephone.
  - 1) Disability
  - 2) No disability
  
10. Current smoker: Respondents who had smoked at least 100 cigarettes in their lifetime and now smoke everyday or some days.
  - 1) Current Smoker
  - 2) Not Current Smoker
  
11. Chronic drinker: Male respondents having an average of more than 2 drinks per day; females respondents having an average of more than 1 drink per day.
  - 1) Chronic Drinker
  - 2) Not Chronic Drinker
  
12. No leisure time physical activity or exercise during the past 30 days other than the respondent's regular job.
  - 1) Leisure Time Activity
  - 2) No Leisure Time Activity
